# Supplementary material for: Enhanced charge transfer kinetics at the electrode/electrolyte interface in acetonitrile solvent for lithium-ion battery cathodes
Source: Royal Society of Chemistry journal article supplement (doi:10.1039/d4cc05812g), 2025-01-01
Supplement: d4cc05812g1.pdf [file d4cc05812g1.pdf]

## Supporting Information

### Enhanced Charge Transfer Kinetics at Electrode/Electrolyte Interface in Acetonitrile Solvent for Lithium-ion Battery Cathodes

Tatsumi Suzuki,<sup>a</sup> Yuki Miyaura,<sup>a</sup> Ken-ichi Okazaki,<sup>a</sup> Chengchao Zhong,<sup>a</sup> Keiji Shimoda,<sup>b</sup> Fumiya Kondo,<sup>c</sup> Masanori Fujii,<sup>c</sup> Hajime Kinoshita<sup>c</sup> and Yuki Oriksa\*<sup>a</sup>

<sup>a</sup> *Department of Applied Chemistry, Ritsumeikan University, 1-1-1 Nojihigashi, Kusatsu, Shiga 525-8577, Japan*

<sup>b</sup> *Ritsumeikan Global Innovation Research Organization, Ritsumeikan University, 1-1-1 Nojihigashi, Kusatsu, Shiga 525-8577, Japan*

<sup>c</sup> *KRI, Inc., 134 Chudoji Minami-machi, Shimogyo-ku, Kyoto 600-8813, Japan*

\* Yuki Oriksa (orikasa@fc.ritsumeai.ac.jp)

**Table S1.** Physical property data of acetonitrile and conventional carbonate-based solvents<sup>S1, S2, S3</sup>.

| Solvent                  | Viscosity (at 298 K) / mPa s  | Donor Number       |
|--------------------------|-------------------------------|--------------------|
| Ethylene carbonate (EC)  | 1.90 (at 313 K) <sup>S1</sup> | 16.4 <sup>S1</sup> |
| Propylene carbonate (PC) | 2.50 <sup>S1</sup>            | 15.1 <sup>S1</sup> |
| Acetonitrile (AN)        | 0.37 <sup>S2</sup>            | 14.1 <sup>S3</sup> |

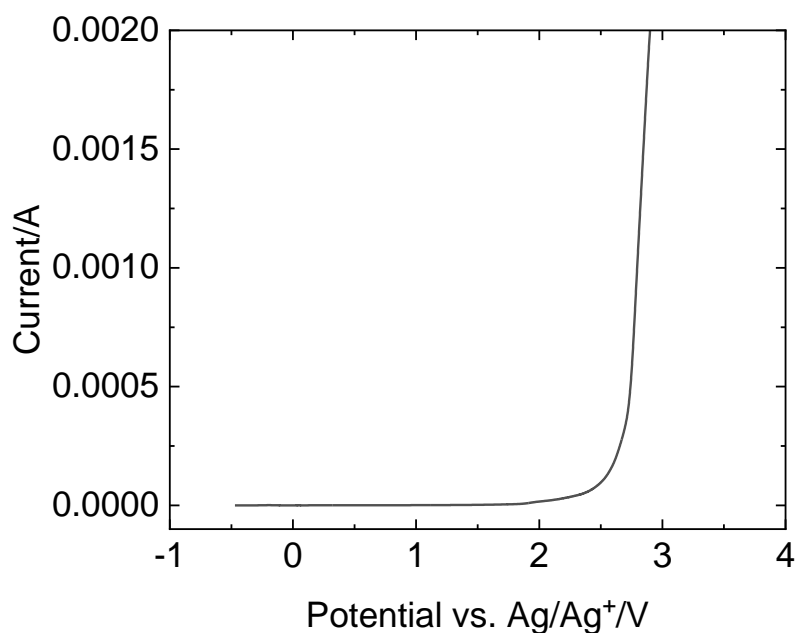

**Figure S1.** Linear sweep voltammogram of Pt electrode in 1 M LiTFSI/AN solution. Scan rate was set at  $1 \text{ mV s}^{-1}$  at room temperature. The oxidation stability of LiTFSI/AN is confirmed to be high up to 2.0 V vs.  $\text{Ag/Ag}^+$ . This potential corresponds to approximately 5.2 V in the  $\text{Li/Li}^+$  reference<sup>S4</sup>, indicating that decomposition of acetonitrile does not occur within the charge/discharge conditions used in this study.

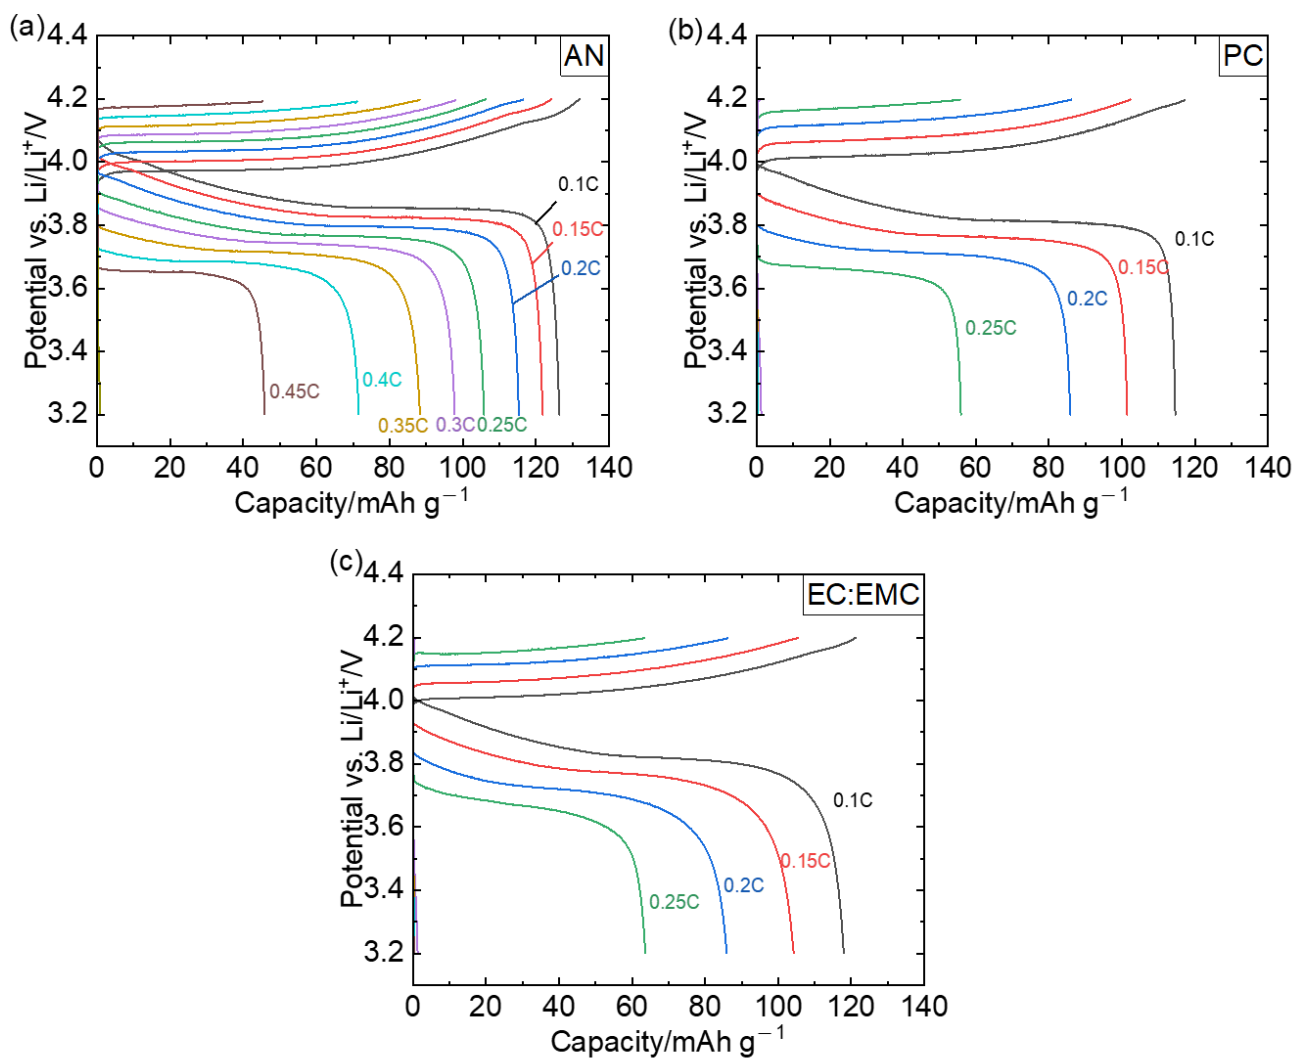

**Figure S2.** Charge/discharge profiles of the dual-compartment cells with LiCoO<sub>2</sub> composite electrodes as the working electrodes and (a) AN, (b) PC, and (c) EC:EMC (3:7 v/v%) containing 1 M LiTFSI as the WE-side electrolytes at 298 K. All cells were cycled twice at each current rate within the potential range of 3.2-4.2 V, and second cycled data are shown here.

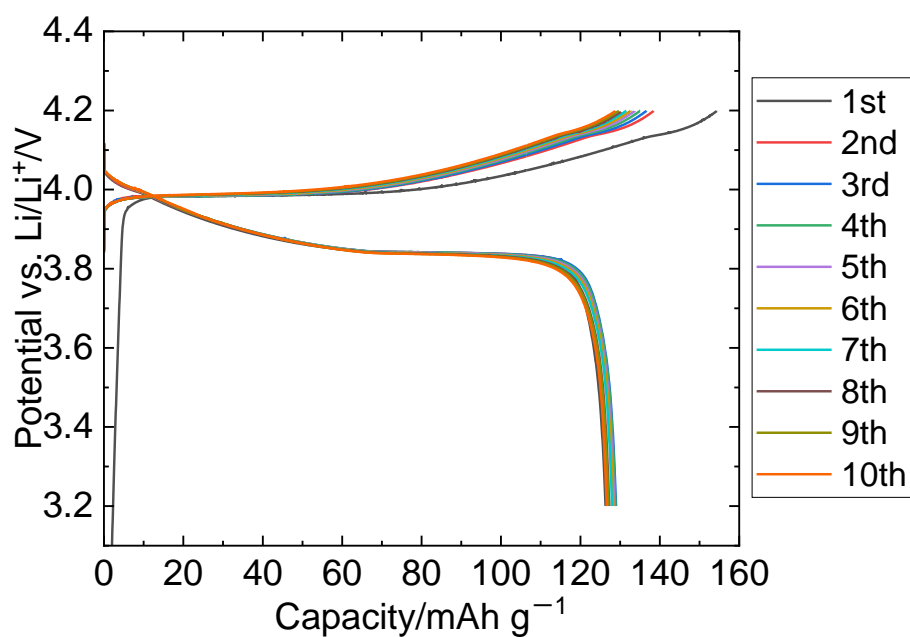

**Figure S3.** Charge/discharge cycle profiles of the dual-compartment cell with a  $\text{LiCoO}_2$  composite electrode as the working electrode and AN containing 1 M LiTFSI as the WE-side electrolyte at the current rate of 0.1C at 298 K.

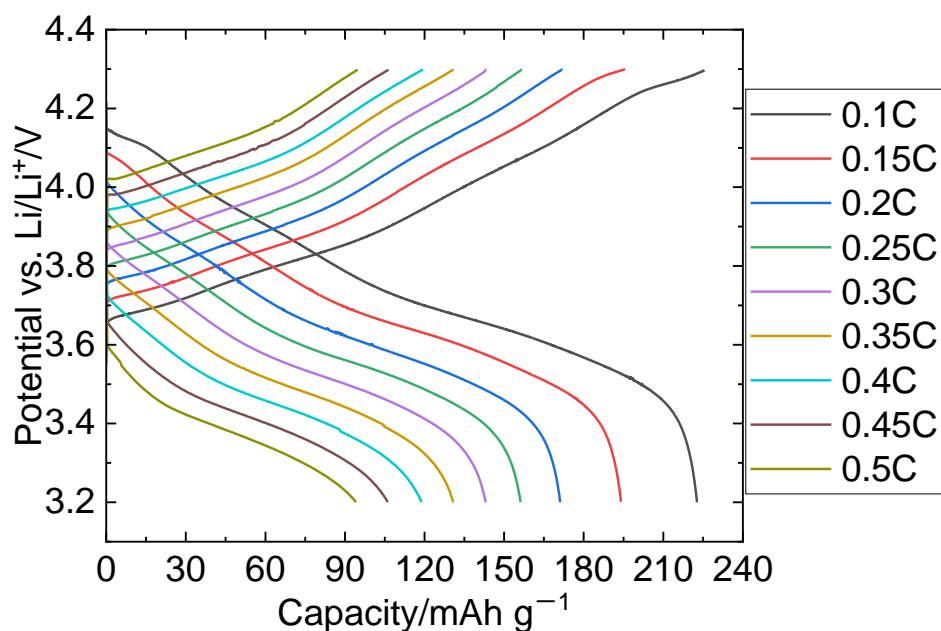

**Figure S4.** Charge/discharge profiles of the dual-compartment cell with a  $\text{LiNi}_{0.8}\text{Mn}_{0.1}\text{Co}_{0.1}\text{O}_2$  composite electrode as the working electrode and AN containing 1 M LiTFSI as the WE-side electrolyte. The cell was cycled twice at each current rate within the potential range of 3.2-4.3 V vs.  $\text{Li/Li}^+$  at 298 K, and second cycled data are shown here.

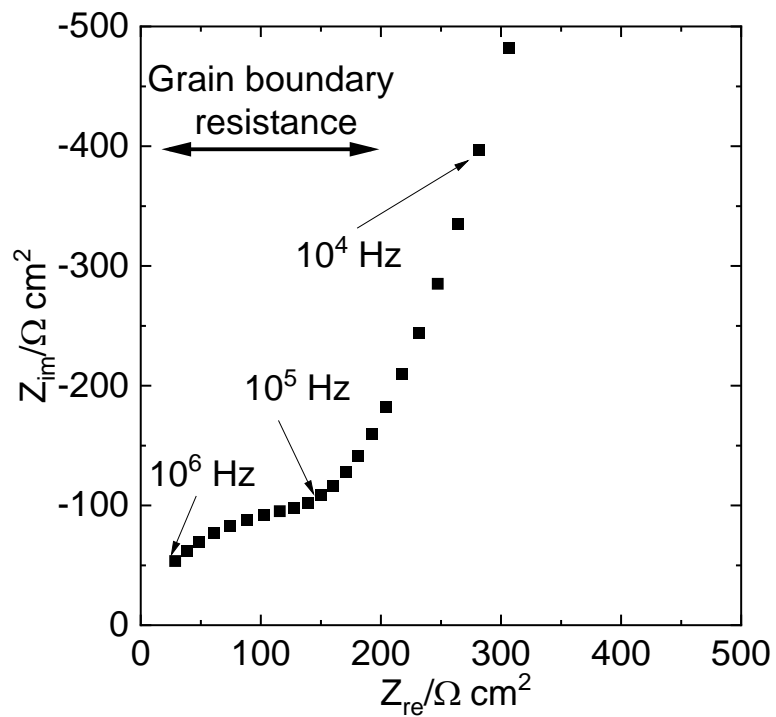

**Figure S5.** Nyquist plot of Au|LATP|Au cell at room temperature. The grain boundary resistance of LATP was observed in high frequency region above  $10^4$  Hz.

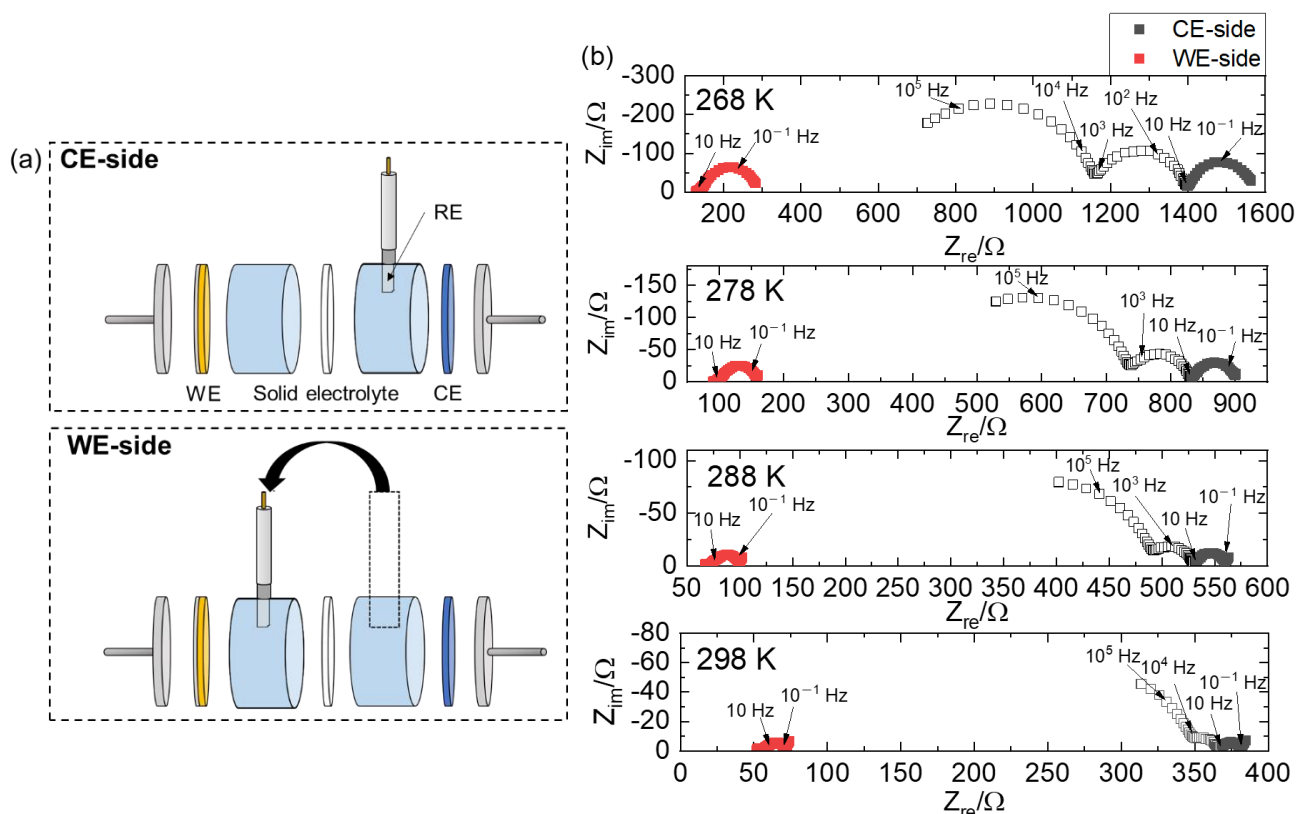

**Figure S6.** (a) Schematic illustration of the cell with the reference electrode placed in the CE-side (top) and WE-side compartments (bottom), and (b) typical Nyquist plots of LiCoO<sub>2</sub> composite electrode|PC containing 1 M LiClO<sub>4</sub>|LATP|PC containing 1 M LiClO<sub>4</sub>|Li cell with the reference electrode placed in different compartments at the WE potential of 4.0 V vs. Li/Li<sup>+</sup> (Frequency range: 200 kHz-10 mHz, amplitude: 10 mV). EIS was carried out by repositioning the reference electrode in the same cell inside an Ar-filled glove box. The black plots show the results of the cell with the CE-side reference electrode, while the red plots show the results of the cell with the WE-side reference electrode. The filled markers of the black plots with the low-frequency semicircle correspond to the semicircle observed in the cell with the WE-side reference electrode.

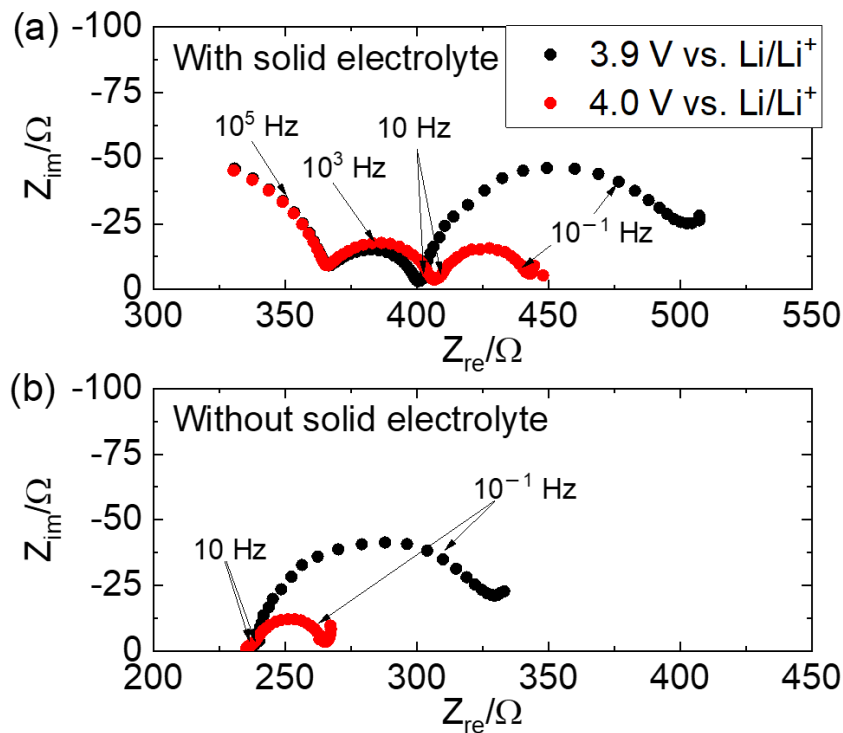

**Figure S7.** Comparison with Nyquist plots obtained from EIS for the cells with and without the solid electrolyte at room temperature. (a) LiCoO<sub>2</sub> composite electrode|PC containing 1 M LiClO<sub>4</sub>|LATP|PC containing 1 M LiClO<sub>4</sub>|Li, (b) LiCoO<sub>2</sub> composite electrode|PC containing 1 M LiClO<sub>4</sub>|Li (Frequency range: 200 kHz-10 mHz, amplitude: 10 mV). The X-axis of each Nyquist plot shifted laterally because of the bulk resistance of the solid electrolyte ( $R_{SE-bulk}$ ).

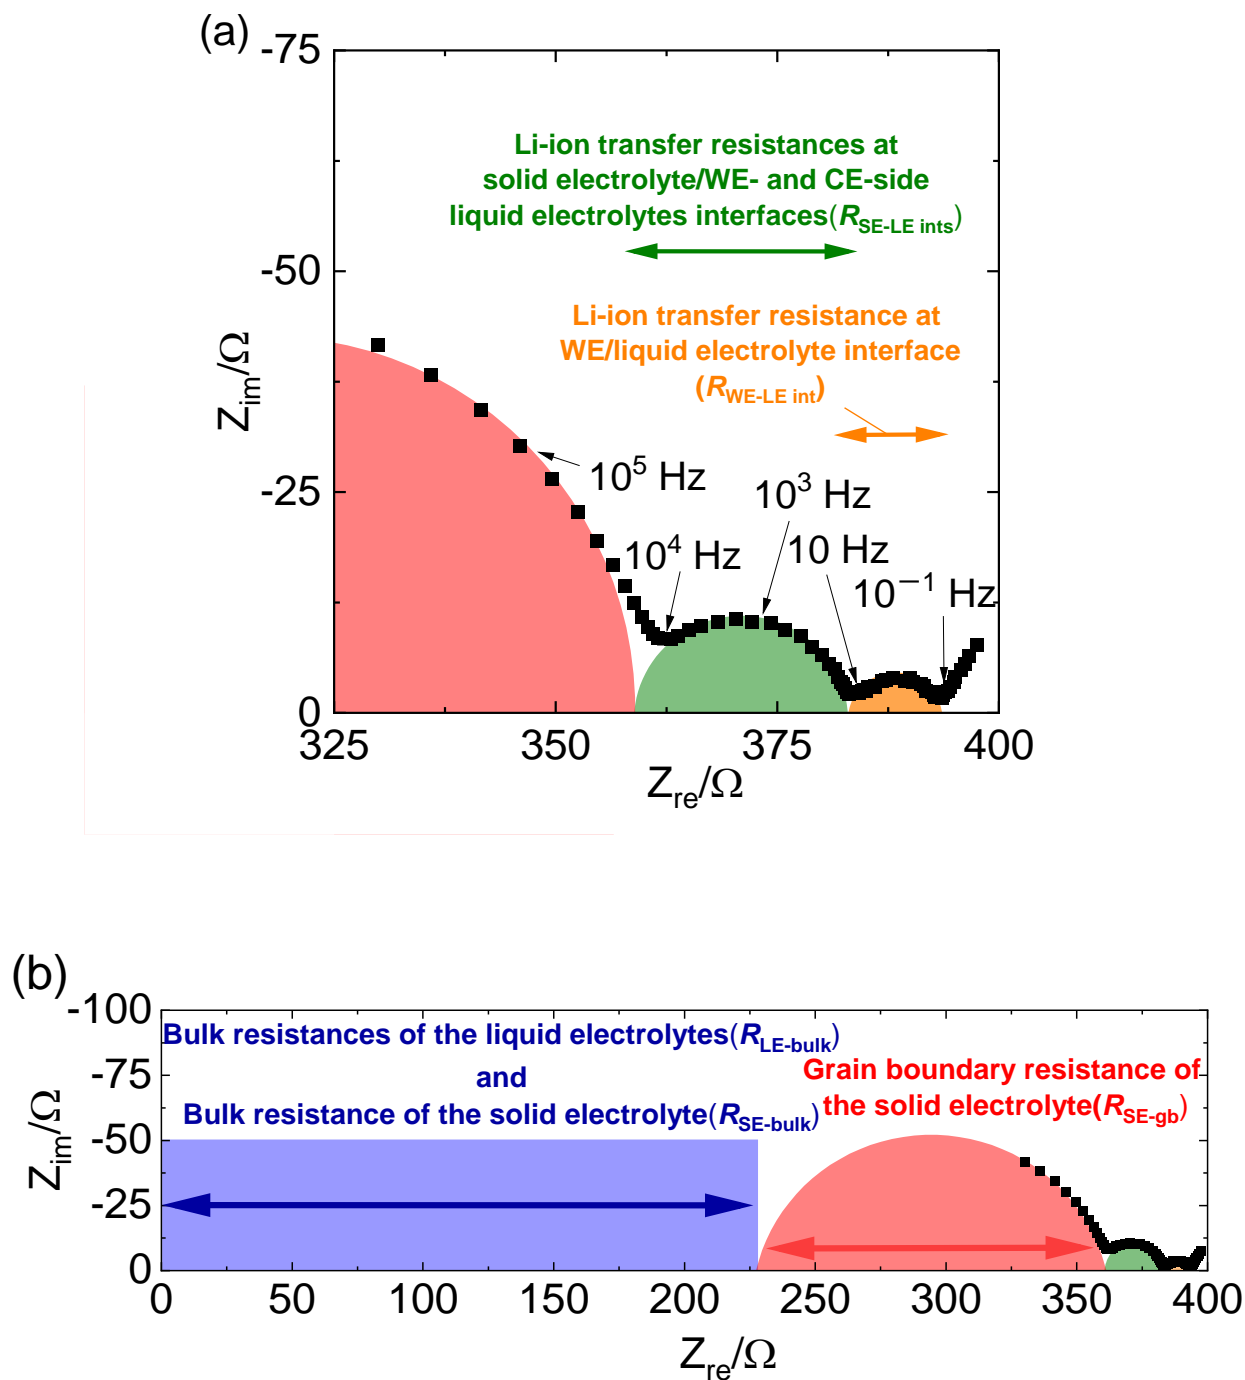

**Figure S8.** (a) Enlarged and (b) overall view of the typical Nyquist plots of the dual-compartment cell at the WE potential of 4.0 V vs. Li/Li<sup>+</sup> at 298 K (Frequency range: 200 kHz-10 mHz, amplitude: 10 mV). Note that the coloured semicircles are shown for visual guidance to help with assignment of resistance components.



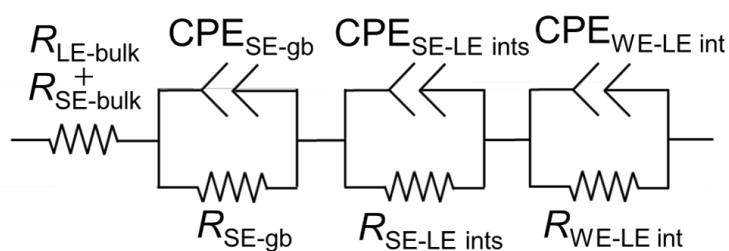

- $R_{LE-bulk}$ : Bulk resistances of the liquid electrolytes  
 $R_{SE-bulk}$ : Bulk resistance of the solid electrolyte  
 $R_{SE-gb}$ : Grain boundary resistance of the solid electrolyte  
 $R_{SE-LE\ int}$ : Li-ion transfer resistances at solid electrolyte/WE- and CE-side liquid electrolytes interfaces  
 $R_{WE-LE\ int}$ : Li-ion transfer resistance at WE/liquid electrolyte interface  
 CPEs : Constant phase elements

**Figure S9.** The equivalent circuit employed for fitting the experimental data.

**Table S2.** Resistance values obtained from EIS for the dual-compartment cells with each WE-side electrolyte. These resistance values were estimated by fitting using the equivalent circuit shown in Fig. S9.

| Internal resistances                                | 1 M LiTFSI/AN<br>/ $\Omega$ | 1 M LiTFSI/PC<br>/ $\Omega$ | 1 M LiTFSI/EC:EMC(3:7 v/v%)<br>/ $\Omega$ |
|-----------------------------------------------------|-----------------------------|-----------------------------|-------------------------------------------|
| Ohmic resistance<br>( $R_{LE-bulk} + R_{SE-bulk}$ ) | 98                          | 227                         | 168                                       |
| $R_{SE-gb}$                                         | 128                         | 136                         | 144                                       |
| $R_{SE-LE\ ints}$                                   | 13                          | 20                          | 22                                        |
| $R_{WE-LE\ int}$                                    | 2                           | 12                          | 10                                        |

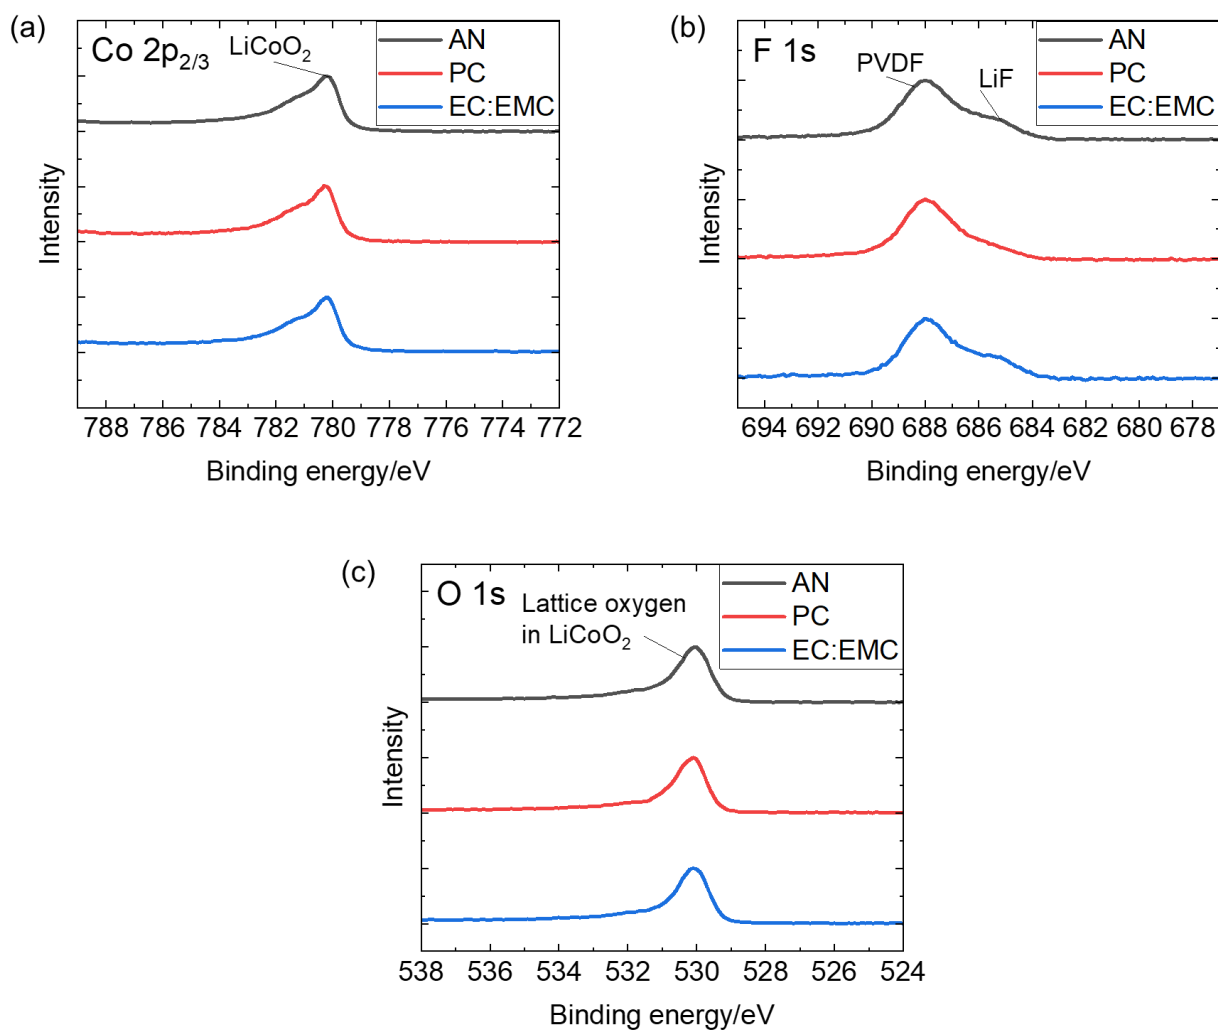

**Figure S10.** (a) Co 2p<sub>2/3</sub>, (b) F 1s, and (c) O 1s HAXPES spectra of the cycled LiCoO<sub>2</sub> composite electrodes in each WE-side electrolyte. Attributed species were also shown in Fig. S10: LiCoO<sub>2</sub><sup>S5</sup>, PVDF<sup>S5</sup>, LiF<sup>S5, S6</sup>, and Lattice oxygen in LiCoO<sub>2</sub><sup>S5</sup>. Since the three WE-side solvents have sufficient anodic stability, cycling within the potential range of 3.2-4.2 V have resulted in the spectral peaks attributable to the oxidative decomposition of LiTFSI salt, rather than that of the solvents.

**Table S3.** The viscosities of three WE-side electrolytes in the temperature range of 268-298 K.

| Temperature/K | 1 M LiTFSI/AN<br>/mPa s | 1 M LiTFSI/PC<br>/mPa s | 1 M LiTFSI/EC:EMC(3:7 v/v%)<br>/mPa s |
|---------------|-------------------------|-------------------------|---------------------------------------|
| 268           | 2.03                    | 33.3                    | 11.8                                  |
| 273           | 1.73                    | 24.5                    | 9.79                                  |
| 278           | 1.55                    | 21.2                    | 8.27                                  |
| 283           | 1.41                    | 16.9                    | 7.17                                  |
| 288           | 1.38                    | 15.0                    | 6.63                                  |
| 293           | 1.31                    | 12.9                    | 5.89                                  |
| 298           | 1.27                    | 11.3                    | 5.43                                  |

## References for Supporting Information

- S1 M. Yoshio and A. Akiya, *J. Power Sources*, 1996, **62**, 219-222.
- S2 K. Xu, *Chem. Rev.*, 2014, **114**, 11413-11862.
- S3 P. Zhou, Y. Xiang and K. Liu, *Energy Environ. Sci.*, 2024, **17**, 8057-8077.
- S4 Y. Marcus, *Pure Appl. Chem.*, 1985, **57**, 1129-1132.
- S5 Y. C. Lu, A.N. Mansour, N. Yabuuchi and Y. Shao-Horn, *Chem. Mater.*, 2009, **21**, 4408-4424.
- S6 J. N. Zhang, Q. Li, Y. Wang, J. Zheng, X. Yu and H. Li, *Energy Storage Mater.*, 2018, **14**, 1-7.
